# Supplementary material for: Reference-mean-centered statistical quality control
Source: publisher site journal article supplement (doi:10.1515/cclm-2019-1034), 2020-01-11

**Supplementary Figure 1**. as a function of for a 3*σ* analytical process with different biases. The analytical process is controlled by bracketed QC with different rules (k = 2, 2.5, 3) with a control sample analyzed by QC event (*n =* 1) and 100 patient samples analyzed between QC events. The value of is expressed relative to that for rejection limits centered on the instrument mean *( =* 0). is expressed as a multiple of .


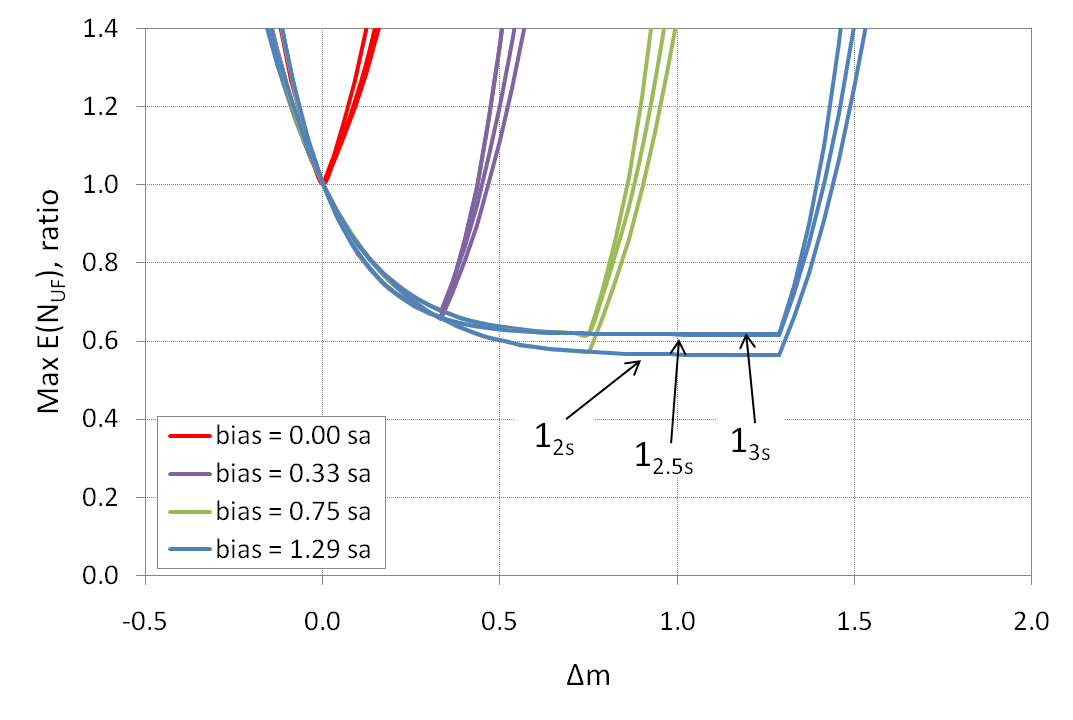


**Supplementary Figure 2**. as a function of for a 3*σ* analytical process with different biases. The analytical process is controlled by bracketed QC with different rules (k = 2, 2.5, 3) with two control samples analyzed by QC event (*n =* 2) and 100 patient samples analyzed between QC events. The value of is expressed relative to that for rejection limits centered on the instrument mean (= 0). is expressed as a multiple of .


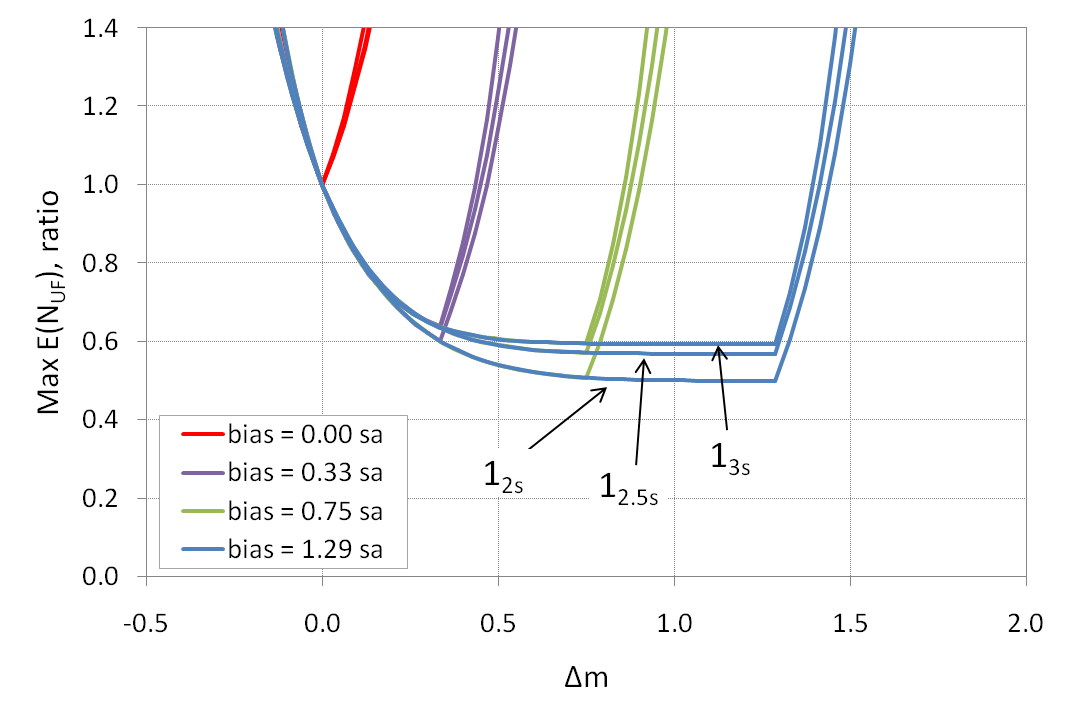


**Supplementary Figure 3**. as a function of for a 4*σ* analytical process with different biases. The analytical process is controlled by bracketed QC with different rules (*k* = 2, 2.5, 3) with two control samples analyzed by QC event (*n =* 2) and 100 patient samples analyzed between QC events. The value of is expressed relative to that for rejection limits centered on the instrument mean ( = 0). is expressed as a multiple of .


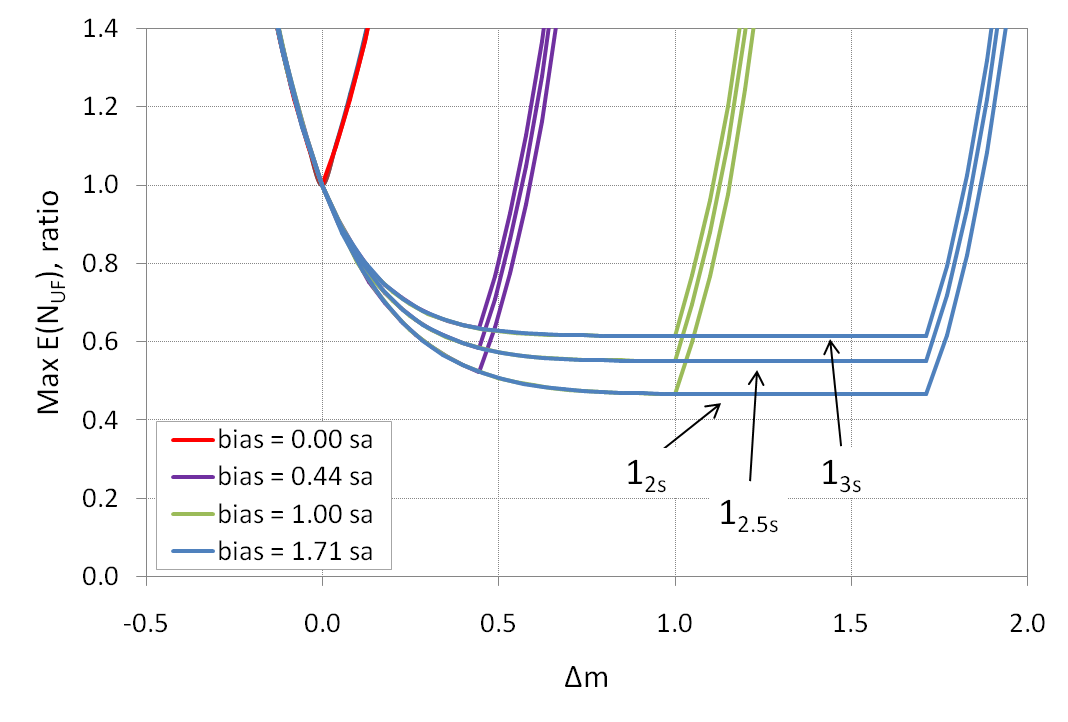


**Supplementary Figure 4**. as a function of for a 6*σ* analytical process with different biases. The analytical process is controlled by bracketed QC with different rules (*k =* 2, 2.5, 3) with two control samples analyzed by QC event (*n =* 2) and 100 patient samples analyzed between QC events. The value of is expressed relative to that for rejection limits centered on the instrument mean *(* = 0). is expressed as a multiple of .


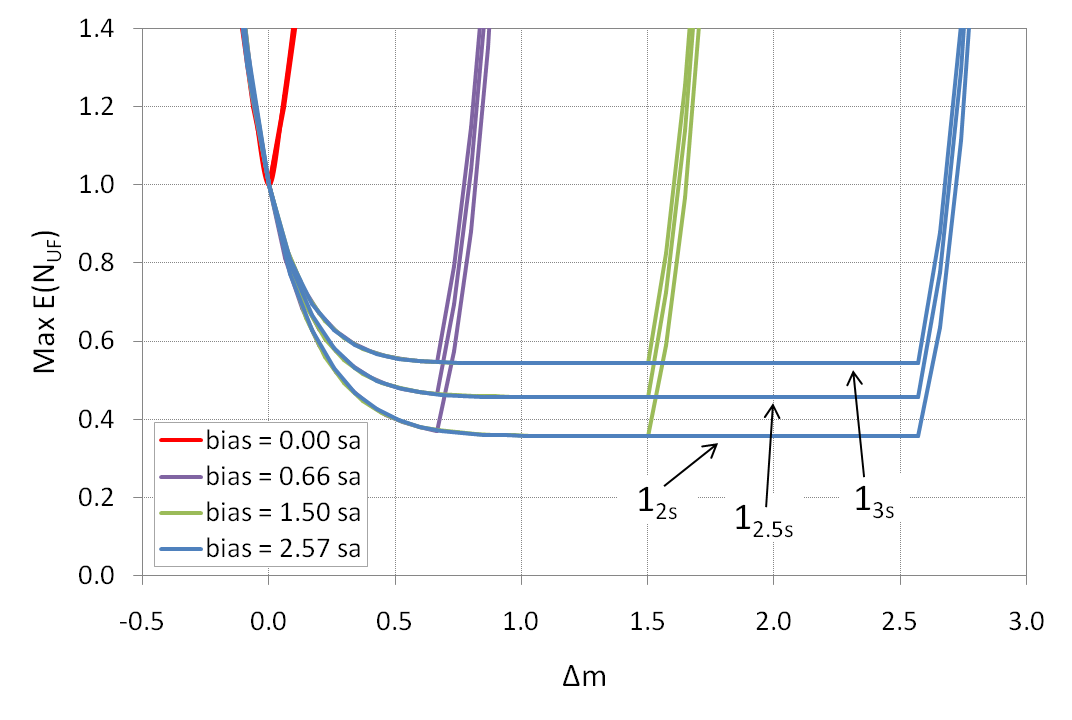

Supplement: Supplementary file 1 [file cclm-2019-1034_suppl.docx]
